# Supplementary material for: Revised recommendations on standards and norms for palliative care in Europe from the European Association for Palliative Care (EAPC): A Delphi study
Source: PubMed Central journal article supplement (PMC9006395; doi:10.1177/02692163221074547), 2022-02-03
Supplement: sj-pdf-1-pmj-10.1177_02692163221074547.pdf [file sj-pdf-1-pmj-10.1177_02692163221074547.pdf]

### **Supplementary file 1: List of selected papers identified in scoping search**

- Balaguer A, Martín-Ancel A, Ortigoza-Escobar D, et al. The model of palliative care in the perinatal setting: a review of the literature. *BMC Pediatr* 2012; **12**, 25: doi.org/10.1186/1471-2431-12-25
- Barazzetti G, Borreani C, Miccinesi G, et al. What "best practice" could be in Palliative Care: an analysis of statements on practice and ethics expressed by the main Health Organizations. *BMC Palliat Care* 2010; **9**, 1: doi.org/10.1186/1472-684X-9-1
- Callaway MV, Connor SR, Foley KM. World Health Organization Public Health Model: A Roadmap for Palliative Care Development. *J Pain Symptom Manage* 2018;**55**,2S:S6-S13: doi:10.1016/j.jpainsymman.2017.03.030
- Claessen SJJ, Francke AL, Belarbi, HE et al. A new set of quality indicators for palliative care: process and results of the development trajectory. *J Pain Symptom Manage* 2011; **42**, 2: 169-182.
- De Roo ML, Leemans K, Claessen SJ, et al. Quality indicators for palliative care: update of a systematic review. *J Pain Symptom Manage* 2013. **46**,4:556-72. doi: 10.1016/j.jpainsymman.2012.09.013.
- Gómez-Batiste X, Stjernsward J, Espinosa J, et al. How to design and implement palliative care public health programmes: foundation measures. An operational paper by the WHO Collaborating Centre for Public Health Palliative Care Programmes at the Catalan Institute of Oncology. *BMJ Supportive & Palliative Care* 2013;**3**:18-25.
- Hui D, Nooruddin Z, Didwaniya N, et al. Concepts and definitions for "actively dying," "end of life," "terminally ill," "terminal care," and "transition of care": a systematic review. *J Pain Symptom Manage* 2014; **47**, 1: 77-89
- Iliffe S, Davies N, Manthorpe J, et al. Improving palliative care in selected settings in England using quality indicators: a realist evaluation. *BMC Palliat Care* 2016;**15**:69: doi:10.1186/s12904-016-0144-1
- Leemans K, Deliens L, Van den Block L, et al. Systematic Quality Monitoring For Specialized Palliative Care Services: Development of a Minimal Set of Quality Indicators for Palliative Care Study (QPAC). *Am J Hosp Palliat Care* 2017;**34**, 6:532-546. doi: 10.1177/1049909116642174.
- Nevin M, Smith V, Hynes G. Non-specialist palliative care: A principle-based concept analysis. *Palliative Medicine* 2019;**33**, 6 :634-649. doi:[10.1177/0269216319840963](https://doi.org/10.1177/0269216319840963)
- Pfaff K, Markaki A. Compassionate collaborative care: an integrative review of quality indicators in end-of-life care. *BMC Palliat Care* 2017; **16**, 65: 10.1186/s12904-017-0246-4
- Radbruch L, Leget C, Bahr P, et al. Euthanasia and physician-assisted suicide: A white paper from the European Association for Palliative Care. *Palliative Medicine* 2015; **30**, 2: 106-116.
- van der Steen JT, Radbruch L, Hertogh CM, et al. White paper defining optimal palliative care in older people with dementia: A Delphi study and recommendations from the European Association for Palliative Care. *Palliative Medicine* 2014;**28**,3:197-209. doi:[10.1177/0269216313493685](https://doi.org/10.1177/0269216313493685)
- Voumard R, Rubli Truchard E, Benaroyo L, Borasio GD, Büla C, Jox RJ. Geriatric palliative care: a view of its concept, challenges and strategies. *BMC Geriatr* 2018;**18**, 1: 220. doi:10.1186/s12877-018-0914-0
- Woitha K, Van Beek K, Ahmed N, et al. Development of a set of process and structure indicators for palliative care: the Europall project. *BMC Health Services Research* 2012; **12**, 381: 10.1186/1472-6963-12-381

Woitha K, Van Beek K, Ahmed N, et al. Validation of quality indicators for the organization of palliative care: A modified RAND Delphi study in seven European countries (the Europall project). *Palliative Medicine* 2014; 28, 2:121-129. doi:[10.1177/0269216313493952](https://doi.org/10.1177/0269216313493952)
